# Supplementary material
Source: PubMed Central journal article supplement (PMC5204165)

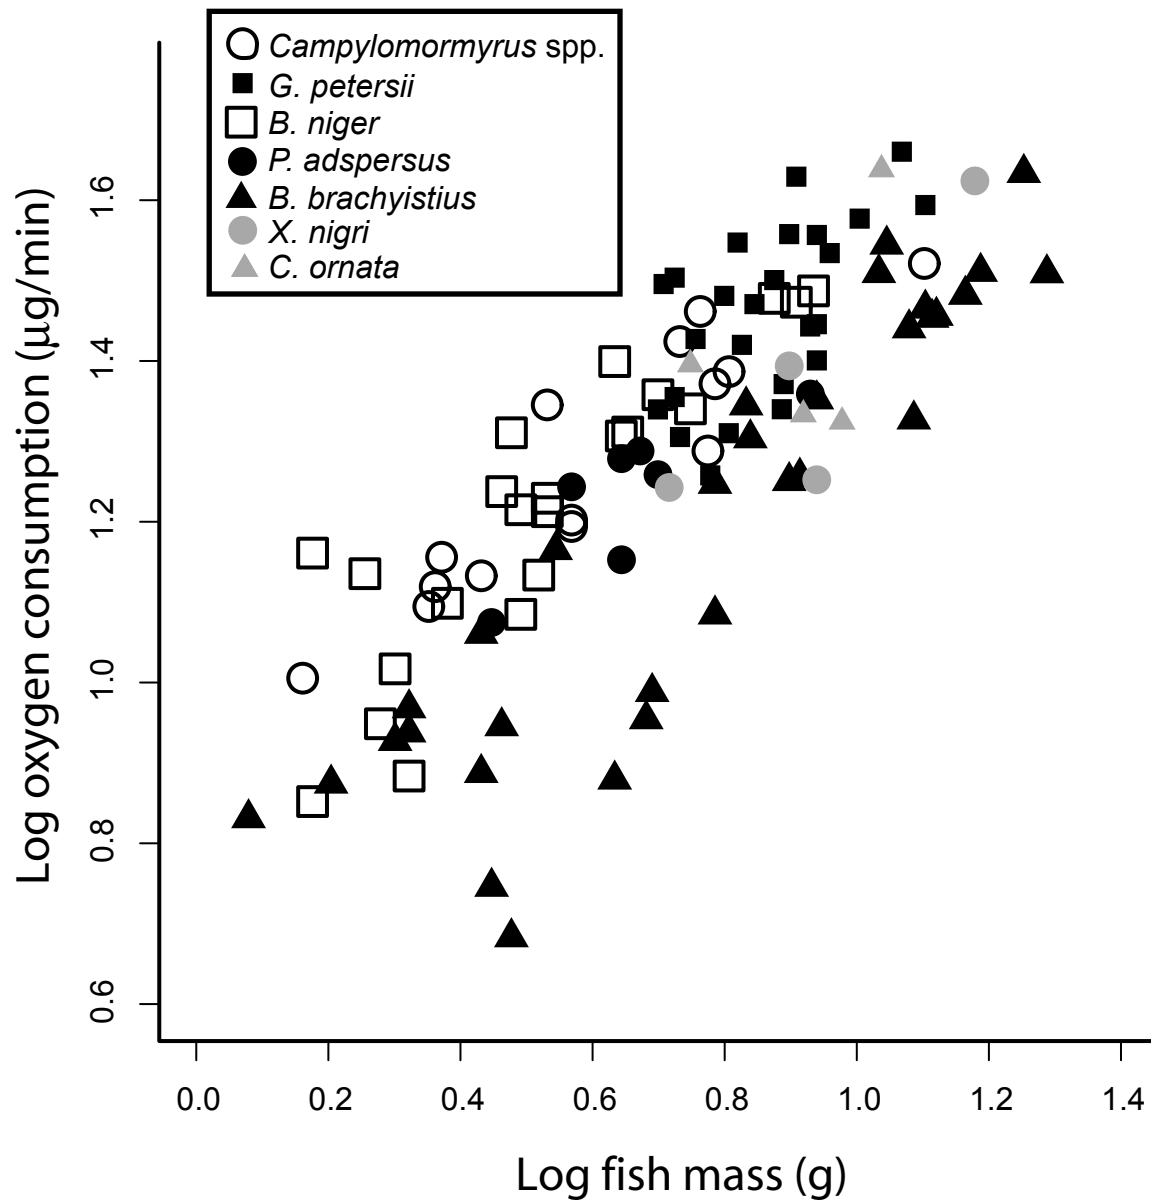

Supplement: rspb20162157supp2.pdf [file rspb20162157supp2.pdf]
